# Supplementary material for: Plasmonic coinage metal–TiO2hybrid nanocatalysts for highly efficient photocatalytic oxidation under sunlight irradiation
Source: Royal Society of Chemistry journal article supplement (doi:10.1039/c5nj00450k), 2015-01-01
Supplement: c5nj00450k1.pdf [file c5nj00450k1.pdf]

## Plasmonic coinage metal-TiO<sub>2</sub> hybrid nanocatalysts for highly efficient photocatalytic oxidation under sunlight irradiation

Rupinder Kaur and Bonamali Pal\*

Fig.S1

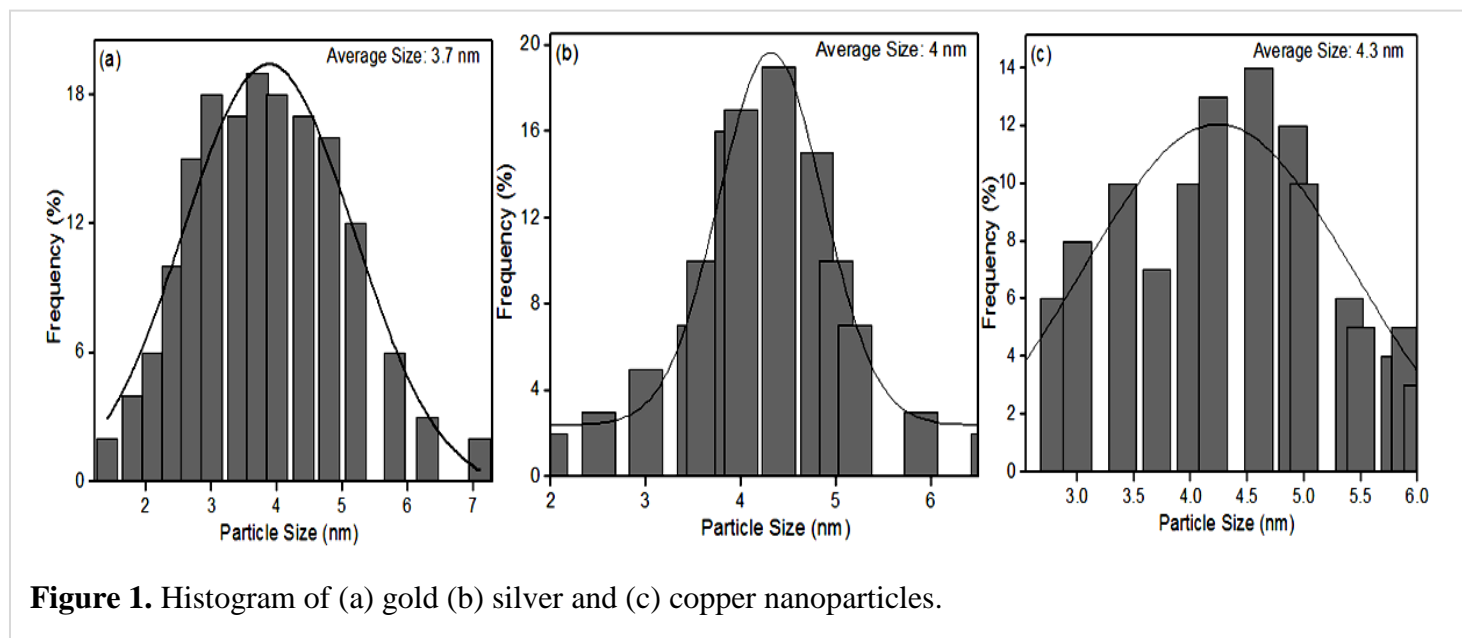

Figure 1. Histogram of (a) gold (b) silver and (c) copper nanoparticles.

Fig.S2

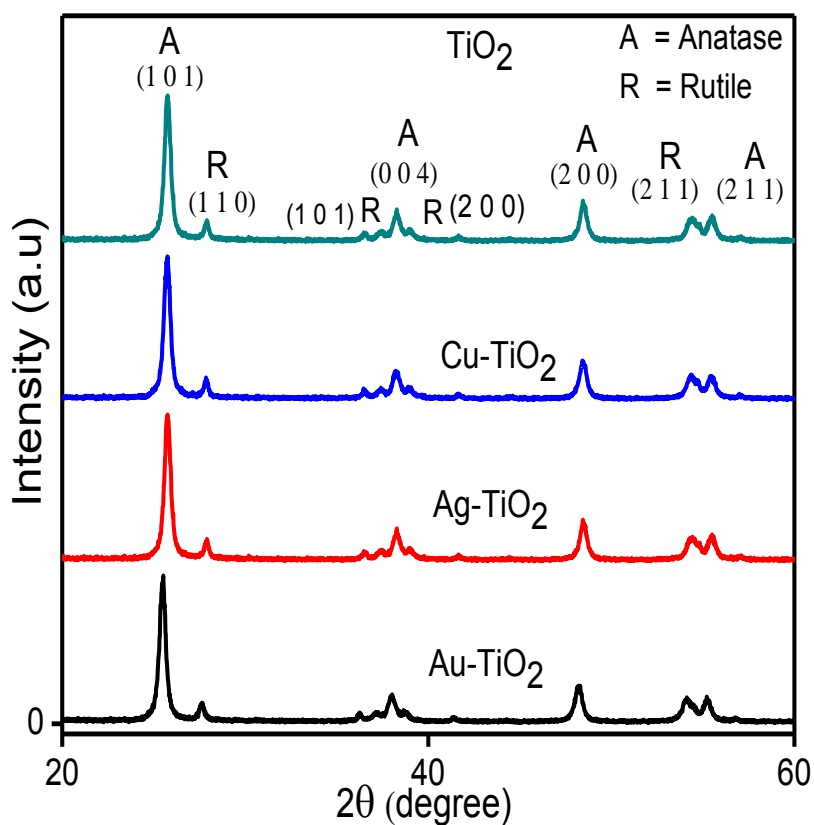

Figure 2: XRD patterns of TiO<sub>2</sub> (P25) and M-TiO<sub>2</sub> composites with loading of 1 wt% coinage metal nanoparticles.

**Fig. S3**

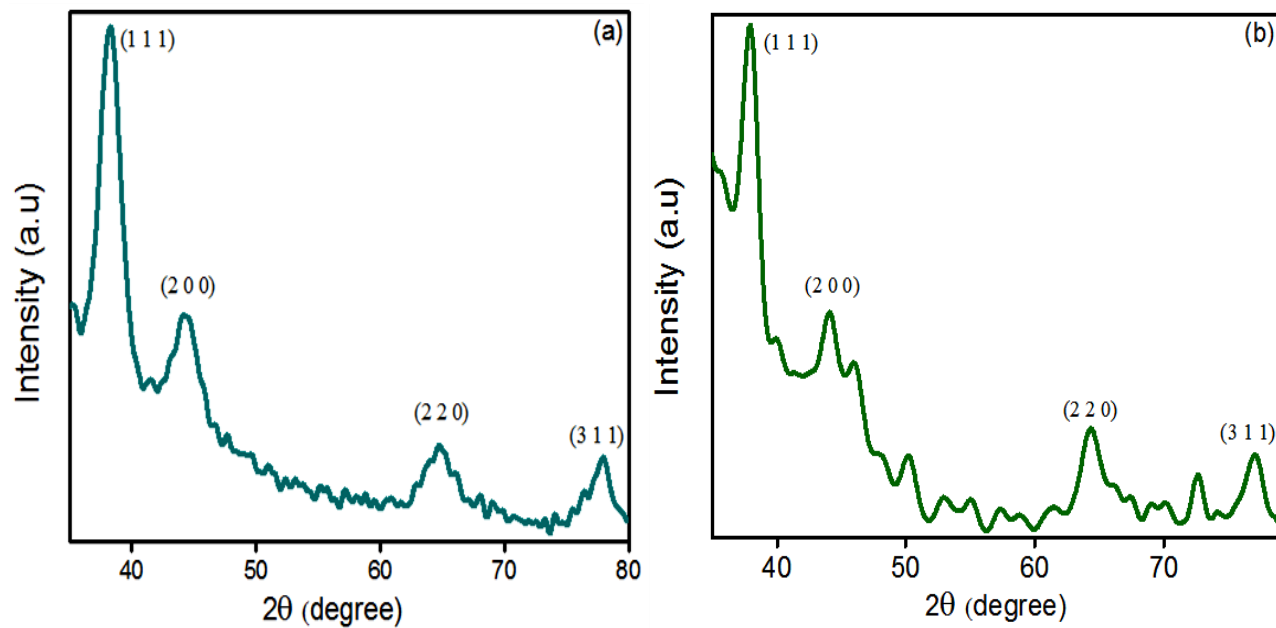

**Figure 3:** XRD patterns of freeze dried (a) Au and (b) Ag metal nanoparticles.

Fig. S4

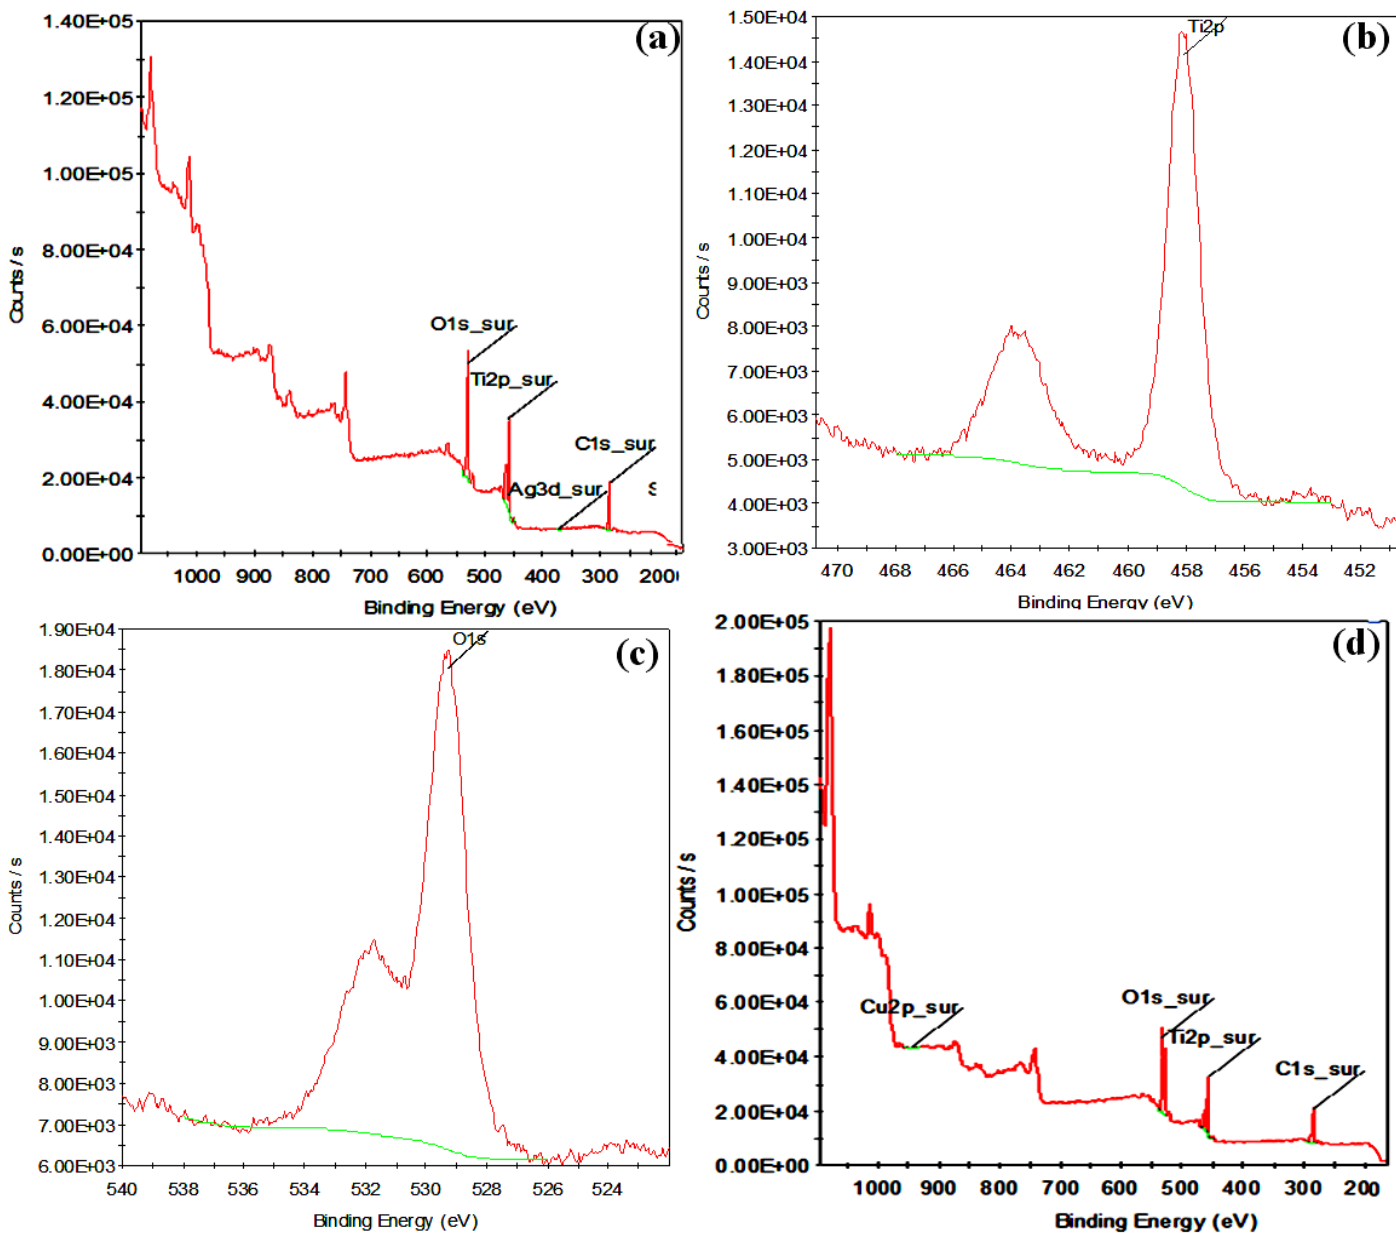

**Figure 4:** (a) Full spectrum XPS of Ag-TiO<sub>2</sub> nanocomposite (b) XPS spectrum of Ti2p, (c) O1s, and (d) Full XPS of Cu-TiO<sub>2</sub> nanocomposite.

**Fig. S5**

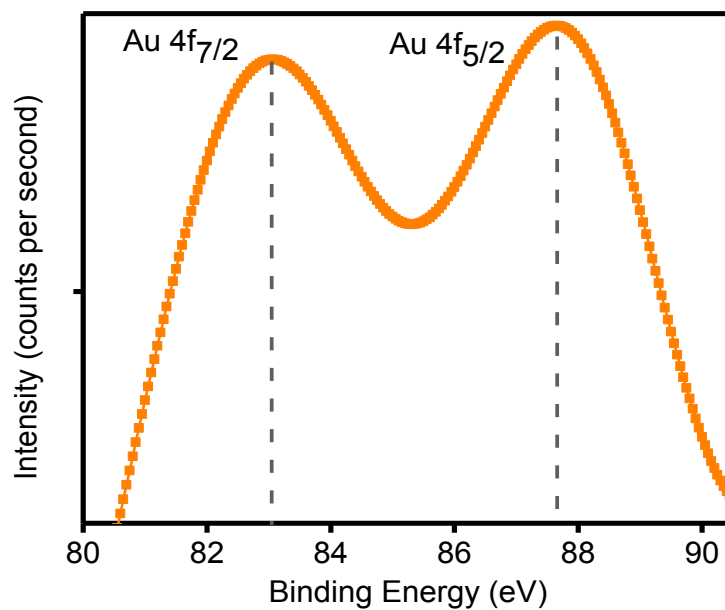

**Figure 5:** XPS spectra of Au 4f region for Au-TiO<sub>2</sub> nanocomposite.

**Fig. S6**

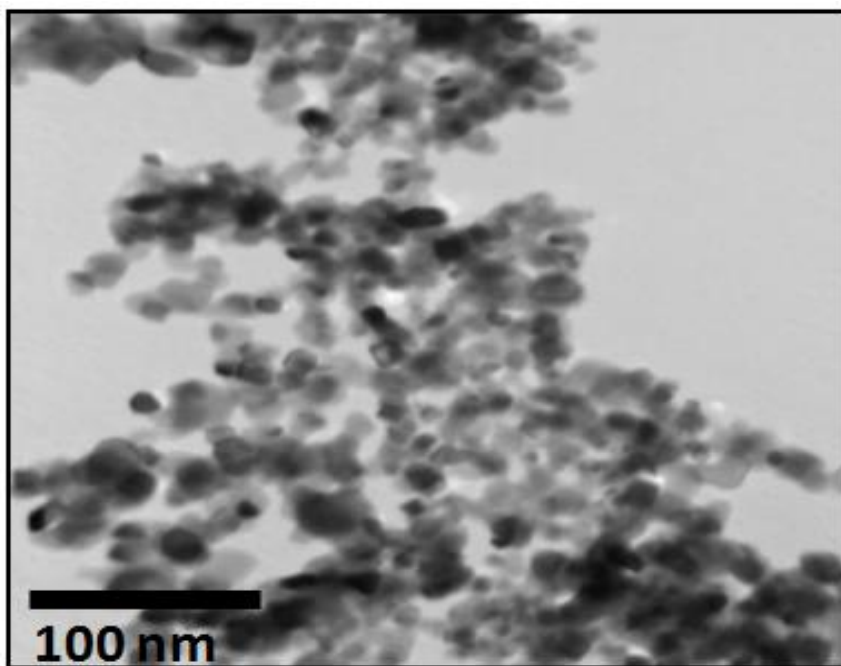

**Figure 6:** TEM image of Au-TiO<sub>2</sub> nanocomposite after recycling.

**Table S1.****Table 1.** Elemental composition and physical parameters of M-TiO<sub>2</sub> composites.

| Catalyst            | Atomic %<br>(XPS data) |       |       |                         | S <sub>BET</sub><br>(m <sup>2</sup> g <sup>-1</sup> ) | Metal<br>reduction<br>potential (eV) |
|---------------------|------------------------|-------|-------|-------------------------|-------------------------------------------------------|--------------------------------------|
|                     | C1s                    | O1s   | Ti2p  | Respective<br>metal (%) |                                                       |                                      |
| TiO <sub>2</sub>    | --                     | --    | --    | --                      | 50                                                    | --                                   |
| Au-TiO <sub>2</sub> | 35.71                  | 50.13 | 14.11 | Au4f (0.06)             | 29                                                    | 1.5                                  |
| Ag-TiO <sub>2</sub> | 35.47                  | 51.04 | 13.14 | Ag3d (0.35)             | 33                                                    | 0.80                                 |
| Cu-TiO <sub>2</sub> | 39.78                  | 50.98 | 8.89  | Cu2p (0.35)             | 20                                                    | 0.34                                 |

**Table S2.****Table 2.** Measurement of voltage (V), current (I), resistance (R), and conductance (S), corresponding to segments I and II of I–V characteristics.

| Catalyst            | Region | Voltage (V) | Current (nA) | Resistance<br>(MΩ) | Conductance (S)<br>× 10 <sup>-7</sup> |
|---------------------|--------|-------------|--------------|--------------------|---------------------------------------|
| TiO <sub>2</sub>    | I      | -2.0        | 330          | 6.060              | 1.65                                  |
|                     | II     | 2.0         | 500          | 5.555              | 1.8                                   |
| Ag-TiO <sub>2</sub> | I      | -2.0        | 540          | 3.703              | 2.7                                   |
|                     | II     | 2.0         | 600          | 3.333              | 3.0                                   |
| Au-TiO <sub>2</sub> | I      | -2.0        | 450          | 4.444              | 2.25                                  |
|                     | II     | 2.0         | 500          | 4.000              | 2.5                                   |
| Cu-TiO <sub>2</sub> | I      | -2.0        | 420          | 4.761              | 2.1                                   |
|                     | II     | 2.0         | 360          | 4.000              | 2.5                                   |
